# Supplementary material
Source: PubMed Central journal article supplement (PMC4012604)
Supplement: supp_pp.114.236539_236539supp.pdf [file supp_pp.114.236539_236539supp.pdf]

**A**

|             |            |            |            |            |            |             |             |             |             |            |            |            |
|-------------|------------|------------|------------|------------|------------|-------------|-------------|-------------|-------------|------------|------------|------------|
| Arabidopsis |            |            | MLVKPSI    | ISGLVRLTSH | SPSSSSSVLR | RQEFVLRITLC | GSPIIR---A  | MSSTSEADAE  | SVLRTVTPSL  | DLKRHKGQAG | KIAVIGGCRE |            |
| Maize       | MSRPTGAWR  | LGMATCTIPA | APRAHVGRLP | GIRQAARPAL | LLPSFSSSTL | LCHRLPPILP  | LVLQLLRVRA  | NHAMAA---S  | AGTVYEADAE  | AVVRRITPAL | DRARHKGQAG | KIAVIGGCRE |
| Onion       |            |            | MNSLA      | IFSSCTESRL | LLSSSILRRQ | L--FLIKTLG  | AYCCRAHMDT  | NQTEAS---G  | ITLALAEADAE | TVIRDITPAL | DPKRHKGQAG | KIAVIGGCRE |
| Switchgrass | MSRPTGAWR  | HQPQHRGRMW | AASPFRRQL  | VLLRSLLPQS | PPPSVAGCRF | AHLSSPSGTS  | GSRAARAMA   | AATVYEADAE  | AVVRRITPPL  | DRARHKGQAG | KIAVIGGCRE |            |
| Wheat       |            |            | MW         | AASPAFRRQL | FLLRSLAPT- | -----CAD    | GGRASSSSLR  | PHLMYA---A  | AGPVYEADAE  | AVVRRITPPL | DRARHKGQAG | KIAIIGGCRE |
| Orange      |            |            | MLIRYGVST  | GFASLGSVKN | CMLASSAVFR | RQQFLIRSLG  | GYSDHIEPRR  | MQDIRS---MS | GTTF-EADAE  | NVMREITPVL | DPSKHKGQAG | KIAVIGGCRE |
| Oak         |            |            | MFVKHGMNS  | QFTLLGSAKH | CMLASSAVLR | RQQFLIRTLG  | GYTDQNHLLR  | MQQTKA---MS | GTAF-EADSE  | NILRAITPPL | DPSKHKGQAG | KIAVIGGCRE |
| Beech       |            |            | MFVRHGMNC  | QFTLLGSAKH | CMLDSSAVFR | RQQFLIRTLG  | GYTDQTHQKR  | MQQTKA---LS | GTAF-EADAE  | NILRAITPPL | DPSKHKGQAG | KIAVIGGCRE |
| Iris        | MLSDLLFFGR | RLVFHDDMSS | WLTFSGCLGN | RLLSSSAIYR | RQLFLIRSLG | --CCKAHMEE  | GRGVPG---VG | VSTS-QTDGE  | TVIQRITPVL  | DPSRHKGHAG | KIAVIGGCRE |            |
| Ginger      |            |            | MRG        | SIPFSCYPEN | CTLASAAVLR | RNLFLIKCLD  | GFCCRSHSQR  | MQGTQS---AA | VPAA-EADAE  | KTIQMIPAL  | DPRIYKQAG  | KIAVIGGCRE |
| Cotton      |            |            | MFVKHGMNS  | GFSS-----  | --LASSAVLR | RQKFLIRSLK  | GYSV-SDKIR  | MEAVKC---LS | GGASLEANA   | SVLRAITPPL | DPTRHKGQAG | KIAVIGGCRE |
| Cocoa       |            |            | MIVKHMNS   | GFSS-----  | --LASSAVLR | RQQFLIRSLR  | GYSDHTHQKR  | MEGMKC---FS | GGASLEADSE  | NVLRAIIPSL | DPTRHKGQAG | KIAVIGGCRE |
| Grape       |            |            | MIKNGVSL   | LHSPNNR--- | -MLASSAVFR | RQEFLIRCLG  | VGGQSQQFNR  | -KSIPR----  | -TMALAEADAE | NILRAITPPL | DLARHKGQAG | KIAVIGGCRE |
| Lotus       |            |            | MNSQLPL    | LRCANTC--- | VLLASSPVFR | RQKLLIRSLG  | SGIDYHNHNS  | SENMQR----  | -MRSVEADAE  | SIIRAITPAL | DSTRHKGQAG | KIAVIGGCRE |
| Rice        |            |            | MW         | AASPAFRRRL | FLLRSLSPSP | CAALPGNAAC  | SSPSPSTSR   | VNAMSA----  | SGPVYEADAE  | AVVRRITPPL | DRARHKGQAG | KIAVIGGCRE |

**B**

|             |            |            |            |            |            |            |            |            |            |            |            |            |            |
|-------------|------------|------------|------------|------------|------------|------------|------------|------------|------------|------------|------------|------------|------------|
| Arabidopsis |            |            | MRNVIR     | RVTMTFTFL  | LQSPPLPISP | SPPQFSLSS  | PLSKTQRFIT | PSQGSRLRTL | CTKVIIPN-- | ----MQDSGS | PP--LSYLTQ | REAAEIDETL |            |
| Maize       | MLAAVAS    | RTRNKSATTV | LSLAMPFLLS | AASASTTNP  | HPLSPFPRSQ | NNSRVHRLQL | PARRLPSFPA | VAPGASFAPL | PQRLGMAS-- | ----LAASAA | AAAEVTHLTQ | RDAAEIDEQL |            |
| Radish      |            |            |            | MTFSTL     | LQ-SPLPISP | K-PLLSYEQH | RYSLSLLPL  | PTHFRLLRT  | FCTKSIPN-- | ----MQDSST | S---VSYLSQ | REAAEIDETL |            |
| Canola      |            |            | MRTVIR     | RRVTRMISAF | LFQQPLPISP | K---HQYSL  | PLTTTQRFLT | ASHGFR---T | LSTKSIPN-- | ----MQDSAS | ---VSYLSQ  | REAAEIDETL |            |
| Lime        | MWSVIRK    | SRRMSMTCSL | LAQSLTLAYH | YNSSPAIKST | CNPFSPFVSN | QSSSSVFLR  | PVSAPAIRAF | CSKSDAM    | S---SAQNSD | ----VSHLTQ | REAAEIDETL |            |            |
| Cotton      |            |            | MICSLLSQ   | APVSPAYYR  | SSPSIYKPK  | SNRFSWGFLA | PIPSPAIRVF | CSKPGEVGG  | ----MASSVQ | NQGSISYLTQ | REAAEIDEVL |            |            |
| Cocoa       |            |            | MICS       | LLTQAPFPLA | YCSSPSSIYE | AKPSGYLP-- | --RFSSGF   | PISSCAIRAL | CSKSGKVG   | ----MASSLQ | NQGSITYLTQ | REAAEIDEIL |            |
| Apple       |            |            | MW         | SLARNTRKMT | RLFLNHSLS  | SNPIKPPIS  | NAYTSFHIPP | SSLSTSALFQ | SVRSPAIRAF | CSNPSGAAGV | GSVHAAPSMQ | NPGDISYLTQ | REAAEIDEVL |
| Rice        | MLTVAASALR | NNKKSTAAAC | FSLAMPFLLS | SPTPPPPPHS | SSL---PRSP | --SPRRLPL  | PPPRRAALVT | AAQDPRW--- | --RRAMASLA | V---SASASA | SGEEVTHLAQ | REAAEIDEQL |            |
| Sorghum     | MLAVA      | SRTRNKSATT | VTLAMPFLLS | AANASATTNS | RPLSPYPRSQ | NNSRAHRLQL | PARRLPSFPA | AAPGAPFAPL | PQRRGMASLA | A---SAAAAA | AAE-VTHLTQ | RDAAEIDEQL |            |
| Orchid      |            |            | MSSCXLS    | RSIKLLIPPP | TATVTVPADT | AASLCVPPRG | ITRHSVPLS  | IFRRPAYLSL | SRRPPSRRCF | ----SLGAQM | AEESVSYLSQ | KEAAEIDEIL |            |

**Supplemental Figure 1.** Amino acid alignment of various plant NAD(P)HX dehydratase (A) and NAD(P)HX epimerase-PPOX (B) amino-terminal sequences that are supported by EST evidence. Completely conserved and highly conserved residues are colored red and blue, respectively. Dashes are gaps introduced to maximize alignment. Predicted alternative start methionine residues are highlighted yellow. The mature protein is predicted to start close to the beginning of high sequence conservation.

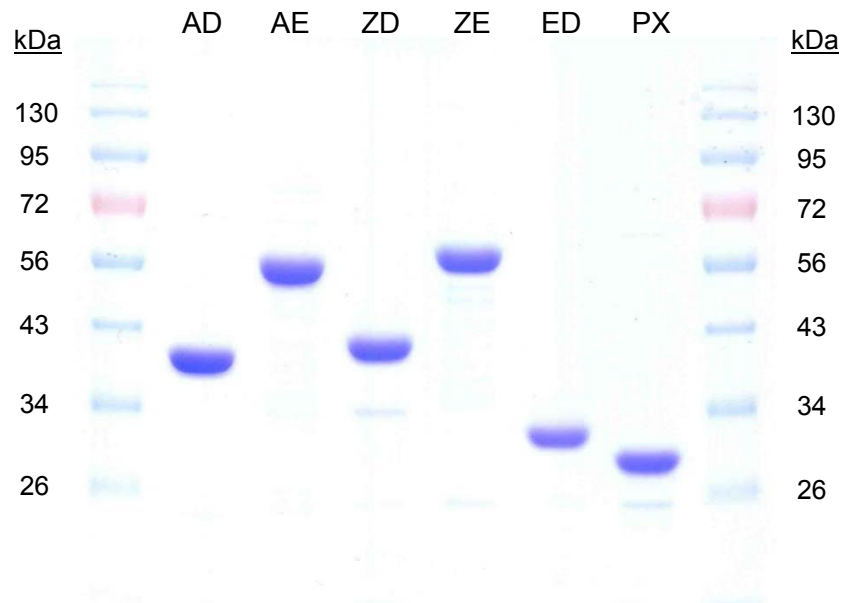

**Supplemental Figure 2.** Purification to near-homogeneity of recombinant proteins used in this study. Five  $\mu\text{g}$  of Ni-affinity purified *Arabidopsis* NAD(P)HX dehydratase (AD), *Arabidopsis* NAD(P)HX epimerase:PPOX (AE), maize NAD(P)HX dehydratase (ZD), maize NAD(P)HX epimerase:PPOX (ZE), *Arabidopsis* NAD(P)HX epimerase separate domain (ED), and *Arabidopsis* PPOX separate domain (PX) were analyzed by SDS-PAGE (10%) with Coomassie staining. Each protein preparation was estimated to be  $\geq 90\%$  pure.

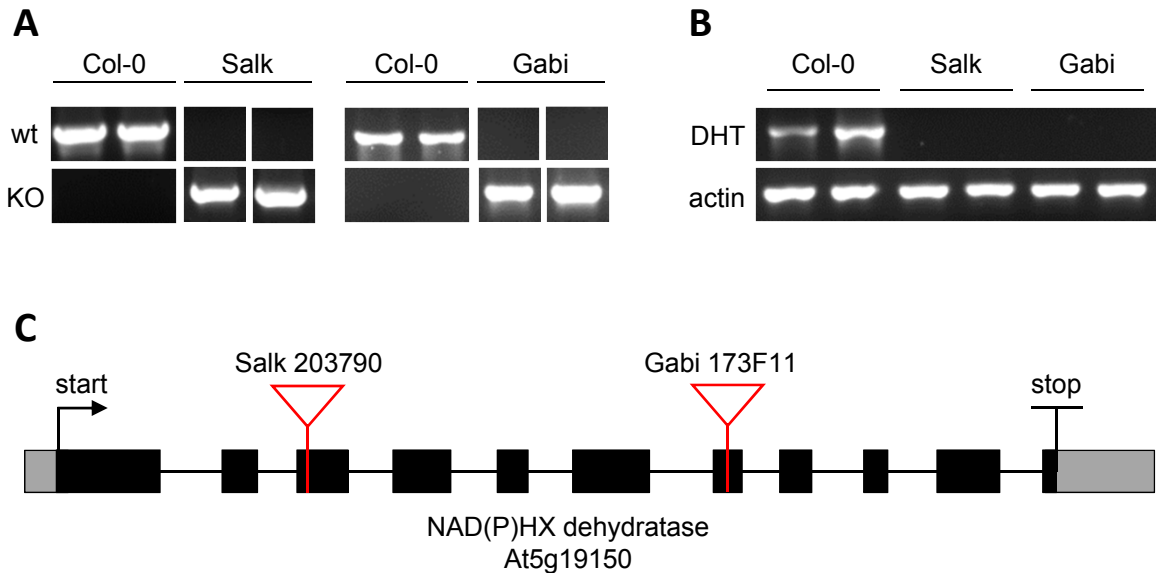

**Supplemental Figure 3.** Confirmation that both *Arabidopsis* NAD(P)HX dehydratase T-DNA insertion lines are knockouts. A, Genotyping the Salk 203790 and Gabi 173F11 lines. Genomic DNA from each line and the corresponding wild-type, Columbia-0 (Col-0) was used as template for PCR reactions with wild-type allele primers (wt, Salk\_LP and Salk\_RP or Gabi-LP and Gabi-RP, respectively) or T-DNA insertion allele primers (KO, Salk\_LBb1.3 and Salk\_RP or Gabi\_LBb and Gabi\_RP, respectively). Amplicons were analyzed by agarose-gel electrophoresis. Results are shown for two wild-type plants and two plants homozygous for the T-DNA insertion. B, Testing for the presence of the NAD(P)HX dehydratase transcript. Total RNA was used for first-strand cDNA synthesis, followed by PCR with primers designed to amplify a fragment of the NAD(P)HX dehydratase transcript (AtDHT 1ex2 F and AtDHT 11ex10 R) or a fragment of the actin-7 transcript (actin-7 F and actin-7 R). Amplicons were analyzed by agarose-gel electrophoresis. C, T-DNA insertion sites in the NAD(P)HX dehydratase gene. PCR amplicons obtained with the T-DNA insertion allele primers in part A above were cloned and sequenced. The gene model is drawn to scale with exons as black boxes, introns as black lines, and 5'- and 3'-UTRs as gray boxes. The T-DNA insertion sites in exon 3 (Salk) and exon 7 (Gabi) are indicated in red. The positions of the first potential start codon and the stop codon are indicated.

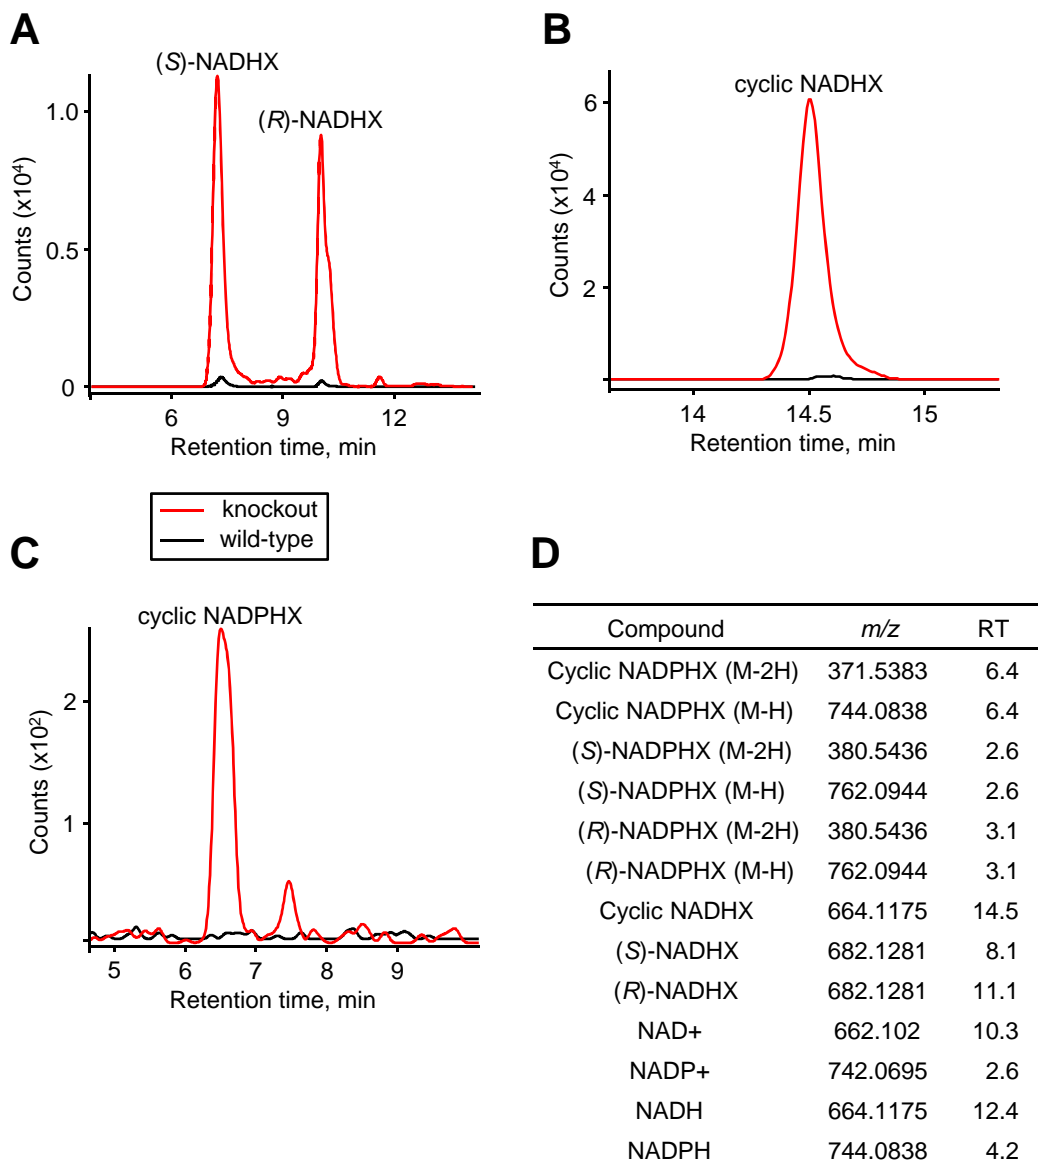

**Supplemental Figure 4.** Targeted metabolomics analysis of NAD(P)HX in *Arabidopsis* seedlings. A, B, and C, Extracted ion chromatograms at  $m/z$  682.1281 (A, NADHX), 664.1175 (B, cyclic NADHX), and 744.0838 (C, cyclic NADPHX) for representative dehydratase knockout (red trace) and wild-type (black trace) samples. D, Molecular ion signals ( $m/z$ ) and retention times (RT, min) used to monitor NAD(P)HX forms and oxidized or reduced pyridine nucleotides.

**A**

atgctggccgcccgttgcgagtcgtaccgtaataaaaagtgctaccaccggttctgtccctggctatgccg  
tttctgctgtccgctgctagcgcacatctaccacgaccaaccgcatccgctgagcccgtttccgctagt  
cagaacaattcccgtgtgcaccgctgcaactgccggcgctcgctgccgagcttcccggcgggtgcc  
ccgggtgcttcttcgctccgctgccgcaacgctctgggtatggcttcgctggctgcaagtGCGGCCGCC  
GCGGCCGAGGT

**B**

atgctggccgcccgttgcgagtcgtaccgtaataaaaagtgctaccaccggttctgtccctggctatgccg  
tttctgctgtccgctgctagcgcacatctaccacgaccaaccgcatccgctgagcccgtttccgctagt  
cagaacaattcccgtgtgcaccgctgcaactgccggcgctcgctgccgagcttcccggcgggtgcc  
ccgggtgcttcttcgctccgctgccgcaacgctctgggtatggcttcgctggctgcaagtGCGGCCGCC  
GCGGCCGAGGTgacgcacctcacgcagcgcgacgcggcggagatcgacgagcagctcatgggcccgctc  
gggttcagcgtcgaccagctcatggaacttgctggattgagcgttgccgagcccttcgaggaggtttac  
aagtgaatgaacatgcaaggtacttgttatctgtggcccaggaaataatgggtggtgatggtctggta  
gctgctcgtcatctttatcactttggatatagggcatctatttgctaccctaaacgcacacccaaacct  
ctatattctgggtctcgttactcagcttgaatcactgtcgatcccattcataacctgtcgaagacctacct  
aacgaattaccacgggagtttgatggtattggtgatgcaatggttggtttctcatttcatggaacaccc  
agaccacctttgatcatcttatccaaatgcttggtttcattgagtgatattcaaaatccagataagcgc  
ccagcaattggtttctattgatatcccttctggatggcatggtgaagagggagatgtcgatggaggcatt  
aaacctgatatgctgggtgctcattgactgcacctaaagctctgtgcaaaaaagttcactggcccacacat  
tttcttgggggaaggtttgtccccccacctattttaacaaatacggacttcagcttctccttacct  
ggcatcaatgtgtgtgagaattggaaaagctccatctgttgaaatttcatctctcagggagaactat  
atccccctgaacttcttgagagtcaagtgatgtctgatccatttgatcagttccttaaattggtttgat  
gaagcagtaacagccggctcgcgtgagcccaatgcaatggctttgacaactgccaacaaggaaggaaaa  
ccttcttcgaggatggttcttttaagggagttgataaacagggatttggttggtatacaaatatggt  
agccggaaggcgcagcttggtgtgaaaaccctaacgcagcactccttttctactggaatgagatgaac  
cgtcaggtaagagttgaaggggtcagttgagaaggttcagaagctgaatcagataaatatcccacagc  
cgcccacgtggaagt cagcttggtgccatagtcagcaagcagagtagtgaattgctggaagagaagtt  
cttcaacaggattacaagaaattggaacaaaaatattctgatgggagcttgattccaaaacctgaatat  
tggggtggctacaaattgacaccgacactttttgagttctggcaaggacaacagctctcgactgcatgac  
cggttacaatactcgcagagagaagtagatgggagcacagtggtggcacatcgagaggttggtccccttga

**Supplemental Figure 5.** Sequence data for maize epimerase/PPOX (GRMZM2G061988). A, Nucleotide sequence of the recoded 5'-region. B, Nucleotide sequence of the assembled complete open reading frame. Recoded nucleotides are in red, native maize epimerase/PPOX sequence is in black, and overlapping sequence used to splice the sequences is in uppercase.

**Table S1.** Predicted localization of *Arabidopsis* and maize NAD(P)HX epimerase and dehydratase proteins

Targeting of the full length *Arabidopsis* (At) and maize (Zm) NAD(P)HX dehydratase and NAD(P)HX epimerase/PPOX sequences was predicted using TargetP (<http://www.cbs.dtu.dk/services/TargetP/>), Predotar (<http://urgi.versailles.inra.fr/predotar/predotar.html>), WoLF PSORT (<http://wolfpsort.org/>), and the COSSMOSS ambiguous targeting algorithm (<http://www.cossmoss.org/bm/ATP>). Predicted locations: P, plastids; M, mitochondria; N, nucleus. In some cases the prediction was weak (<).

| Protein           | TargetP | Predotar | WoLF PSORT | COSSMOSS          |
|-------------------|---------|----------|------------|-------------------|
| At Dehydratase    | P       | P        | P,M        | <(P,M)            |
| Zm Dehydratase    | M       | <M       | P,<M       | <(P,M)            |
| At Epimerase/PPOX | P       | <M       | P,<N       | P,M               |
| Zm Epimerase/PPOX | P       | <M       | M,<P       | no dual targeting |

**Table S2.** Oligonucleotide primers used in this study.

Restriction enzyme sites are capitalized.

| Primer                                          | Name             | Sequence                                      |
|-------------------------------------------------|------------------|-----------------------------------------------|
| <b>Maize epimerase assembly</b>                 |                  |                                               |
| 1                                               | Epm assemble1F   | gcggccgcgcggcgagggtgacgc                      |
| 2                                               | Epm assemble1R   | acctccgcgcggcgaggccgcaacttgc                  |
| 3                                               | Zm Epm FL NdeI F | ggaattcCATATGctggccgcggttgcgagtcg             |
| 4                                               | Zm Epm EcoRI R   | gGAATTCTcaaggggacaacctctcgatgtgcc             |
| <b>Protein overexpression in <i>E. coli</i></b> |                  |                                               |
| 5                                               | At Dht m NdeI F  | ggaattcCATATGagttccacatcagaggccg              |
| 6                                               | At Dht EcoRI R   | gGAATTCttaagatgcagggcagatatcc                 |
| 7                                               | At Epm m NdeI F  | ggaattcCATATGcaagattcaggatcaccacc             |
| 8                                               | At Epm EcoRI R   | gGAATTCtcatggggccaatctatgaattttcc             |
| 9                                               | Zm Dht m NdeI F  | ggaattcCATATGcggcgctccgcgggacgg               |
| 10                                              | Zm Dht EcoRI R   | gGAATTCctagtgtctcggcagggcagatatc              |
| 11                                              | Zm Epm m NdeI F  | ggaattcCATATGgcttcgctggctgcaagtgc             |
| 12                                              | At ED EcoRI R    | gGAATTCctagacatagttcactctcatagcag             |
| 13                                              | At PPOX NdeI F   | ggttttcCATATGtgtgttagaattggtaaacc             |
| <b>IVT and dual import</b>                      |                  |                                               |
| 14                                              | Dht FL EcoRI F   | gGAATTCctgAtgttgggaagcccagatcatc              |
| 15                                              | Dht T EcoRI F    | gGAATTCaccatgagttccacatcagaggccg              |
| 16                                              | Dht XbaI R       | gcTCTAGAttaagatgcagggcagatatcc                |
| 17                                              | Dht M2L F        | gggtcaccaatcatcagagcattgagttccacatcagaggccg   |
| 18                                              | Dht M2L R        | cggcctctgatgtggaactcaatgctctgatgatgggtgaccc   |
| 19                                              | Epm FL EcoRI F   | gGAATTCtaaagagggaatgtgatacgcagagtc            |
| 20                                              | Epm T EcoRI F    | gGAATTCaccatgcaagattcaggatcaccacc             |
| 21                                              | Epm XbaI R       | gcTCTAGAtcatggggccaatctatgaattttcc            |
| 22                                              | Epm M2L F        | gtaccaaagtcatcataccaacttgcaagattcaggatcaccacc |
| 23                                              | Epm M2L R        | gggtggatcctgaatcttgcaagttggatgatgactttggtac   |
| <b>GFP fusions</b>                              |                  |                                               |
| 24                                              | Dht FL BamHI F   | cgcGGATCCctgatgttgggaagcccagatcatc            |
| 25                                              | Dht T BamHI F    | cgcGGATCCatgagttccacatcagaggccgacg            |
| 26                                              | Dht BamHI R      | cgcGGATCCagatgcagggcagatatcctcc               |
| 27                                              | Epm FL BamHI F   | cgcGGATCCtaaagagggaatgtgatacgcagagtc          |
| 28                                              | Epm T BamHI F    | cgcGGATCCatgcaagattcaggatcaccacc              |
| 29                                              | Epm BamHI R      | cgcGGATCCtggggccaatctatgaattttcc              |
| <b><i>Arabidopsis</i> knockouts</b>             |                  |                                               |
| 30                                              | Salk LP          | tcattcacatttggggttaagac                       |
| 31                                              | Salk RP          | cgattgacttctcattcaccttc                       |
| 32                                              | Salk LBb1.3      | atthttgcccatttcggaac                          |
| 33                                              | Gabi LP          | attgagacgaaatgtttttgtgg                       |
| 34                                              | Gabi RP          | caaaaagtccaatgttctctttg                       |
| 35                                              | Gabi LBb         | atattgaccatcatactcattgc                       |
| 36                                              | At DHT 1ex2 F    | caaaggccaagctggaagatagc                       |
| 37                                              | At DHT 11ex10 R  | ggcagatatcctccaaactctccc                      |
| 38                                              | At actin-7 F     | atggccgatgggtgaggat                           |
| 39                                              | At actin-7 R     | gtctcaaacatgatctgagtc                         |
